# Supplementary material for: Mode of anesthesia is not associated with outcomes following emergency hip fracture surgery: a population-level cohort study
Source: HighWire-hosted journal article supplement (doi:10.1136/tsaco-2022-000957), 2022-09-01

Mode of anesthesia is not associated with postoperative adverse events within subgroups of the hip fracture population

Mohammad Ismail *et al.*  
Trauma Surgery and Acute Care Open  
September 2022

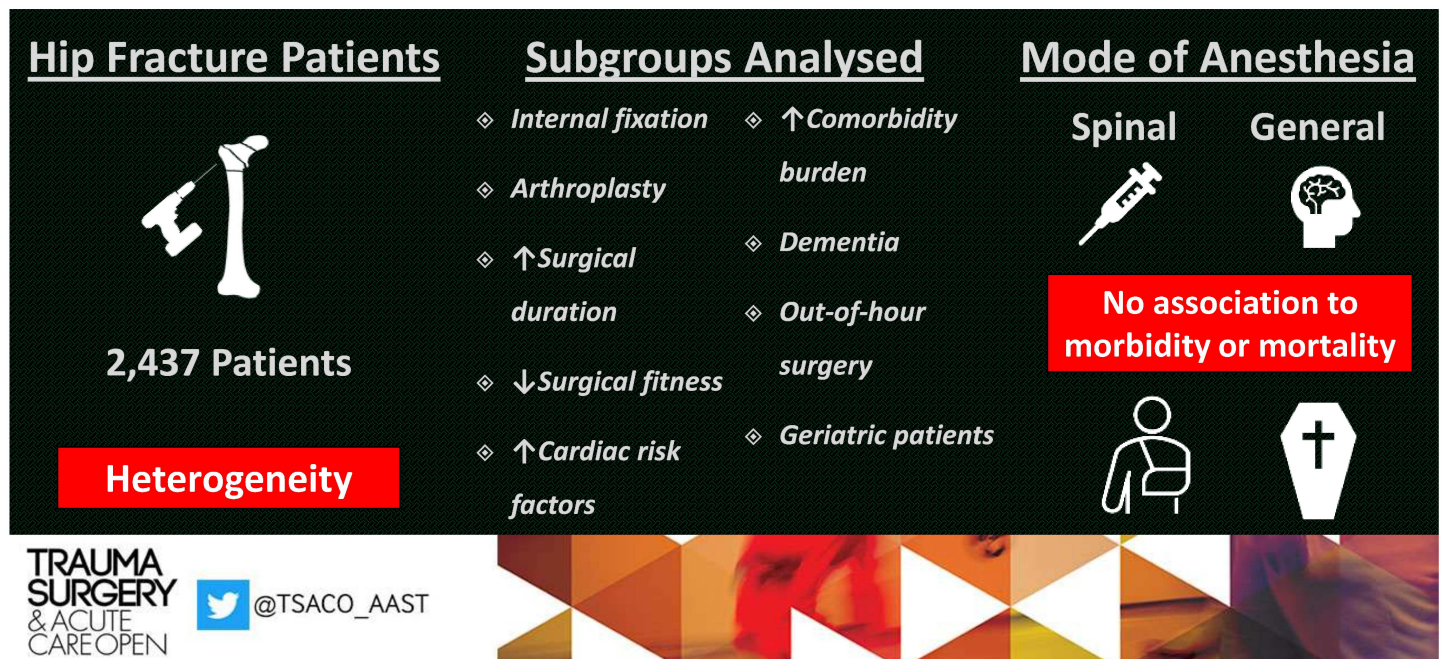

Supplement: tsaco-2022-000957supp001_data_supplement.pdf [file tsaco-2022-000957supp001_data_supplement.pdf]
